# Supplementary material
Source: PubMed Central journal article supplement (PMC7323378)
Supplement: JGS-68-1899-s001.pdf [file JGS-68-1899-s001.pdf]

## Supplements

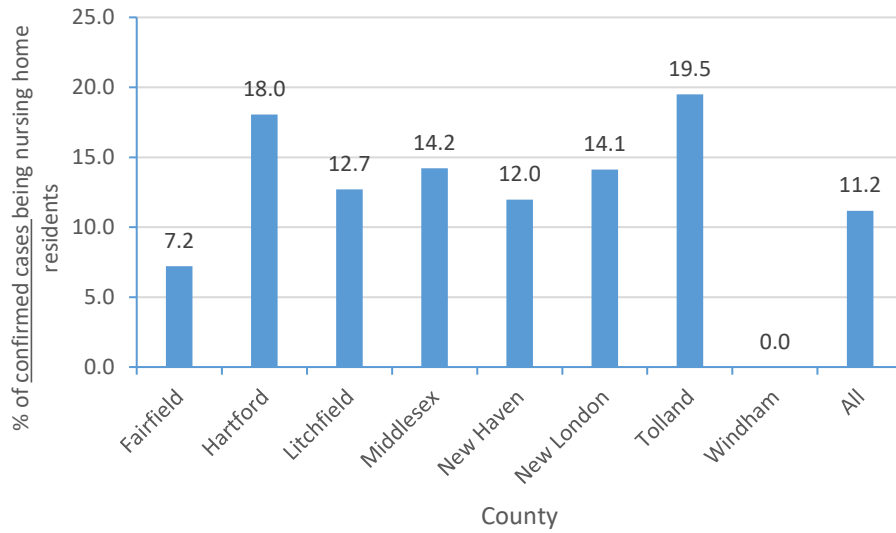

(A)

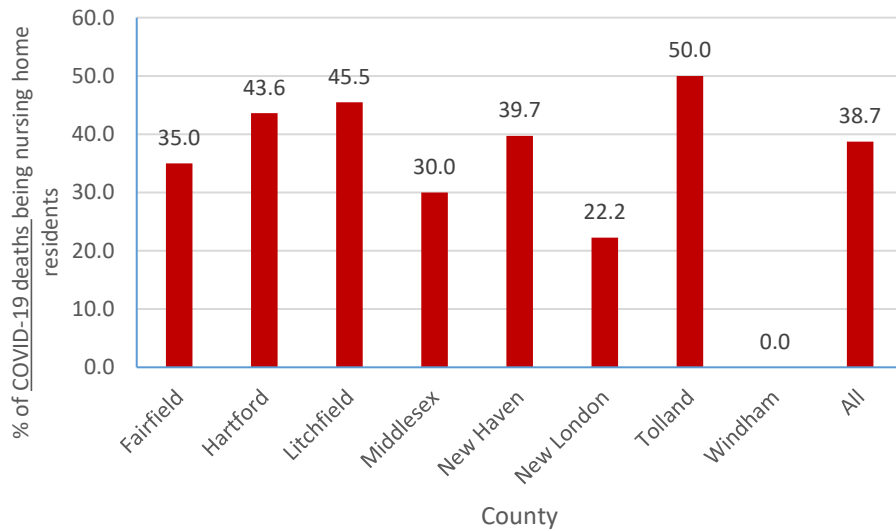

(B)

Supplementary Figure S1. Proportions of COVID-19 confirmed cases (A) and deaths (B) who were nursing home residents by county of Connecticut, as of April 16, 2020.

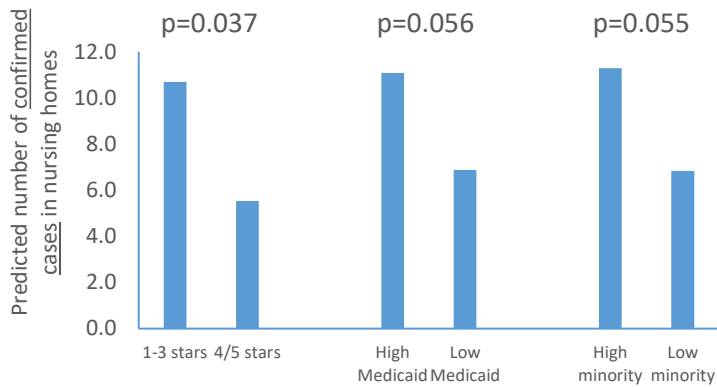

(A)

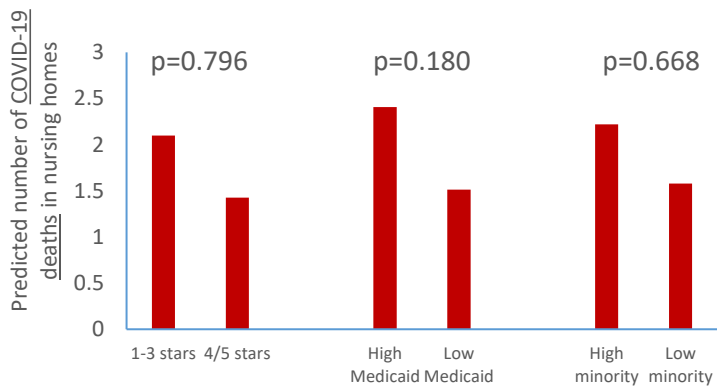

(B)

Supplementary Figure S2. Predicted numbers of COVID-19 confirmed cases (A) and deaths (B) among Connecticut nursing home residents (as of April 16, 2020) versus nursing home 5-star ratings, high vs. low concentration of Medicaid residents, and high vs. low racial and ethnic minority residents in the nursing home (p-values are for the independent associations of nursing home categories with predicted counts that were derived from the joint tests of the two-part regression models).

## Full model results

### Variable labels:

|                                   |                                                  |
|-----------------------------------|--------------------------------------------------|
| reported_rn_staffing_hours_per_r: | RN staffing hrs/resident day                     |
| rating4plus:                      | star ratings 4 or 5 (1/0)                        |
| nh_mcaid_top_quartile:            | %Medicaid residents, top quartile group (1/0)    |
| nh_minority_top_quartile:         | %minority residents, top quartile group (1/0)    |
| number_of_certified_beds:         | # certified beds                                 |
| average_number_of_residents_per:  | average daily resident census                    |
| nfp_gov:                          | non-profit or government-owned (vs for-profit)   |
| chain:                            | chain affiliation (1/0)                          |
| avg_casemix:                      | case mix index                                   |
| pctmcare_10:                      | percentage of Medicare residents x 10            |
| reported_total_nurse_staffing_ho: | total nurse staffing hrs/resident day            |
| comm_cases_total_10:              | county COVID-19 cases not in nursing homes x 10  |
| comm_deaths_total_10:             | county COVID-19 deaths not in nursing homes x 10 |
| pop_est_100k:                     | county pop size x 100k                           |

| nh_covid_cases                   | Coef.     | Std. Err. | z     | P> z  | [95% Conf. Interval] |           |
|----------------------------------|-----------|-----------|-------|-------|----------------------|-----------|
| <b>logit</b>                     |           |           |       |       |                      |           |
| reported_rn_staffing_hours_per_r | -.6433052 | 1.050644  | -0.61 | 0.540 | -2.70253             | 1.41592   |
| rating4plus                      | -.293662  | .3613267  | -0.81 | 0.416 | -1.001849            | .4145254  |
| nh_mcaid_top_quartile            | .4055116  | .4660623  | 0.87  | 0.384 | -.5079537            | 1.318977  |
| nh_minority_top_quartile         | -.0311767 | .424506   | -0.07 | 0.941 | -.8631932            | .8008398  |
| number_of_certified_beds         | -.0028316 | .009437   | -0.30 | 0.764 | -.0213277            | .0156645  |
| average_number_of_residents_per  | .0174743  | .0108425  | 1.61  | 0.107 | -.0037766            | .0387251  |
| nfp_gov                          | -.1069181 | .5423517  | -0.20 | 0.844 | -1.169908            | .9560717  |
| chain                            | .3461901  | .3717899  | 0.93  | 0.352 | -.3825046            | 1.074885  |
| avg_casemix                      | 3.75081   | 1.929801  | 1.94  | 0.052 | -.0315305            | 7.533151  |
| pctmcare_10                      | .1135988  | .1855456  | 0.61  | 0.540 | -.2500638            | .4772614  |
| reported_total_nurse_staffing_ho | -.624952  | .4974027  | -1.26 | 0.209 | -1.599843            | .3499395  |
| comm_cases_total_10              | .002774   | .0014759  | 1.88  | 0.060 | -.0001188            | .0056667  |
| pop_est_100k                     | .0904221  | .0856561  | 1.06  | 0.291 | -.0774609            | .258305   |
| _cons                            | -4.518218 | 2.27337   | -1.99 | 0.047 | -8.973941            | -.0624952 |
| <b>glm</b>                       |           |           |       |       |                      |           |
| reported_rn_staffing_hours_per_r | -.7529878 | .2082693  | -3.62 | 0.000 | -1.161188            | -.3447874 |
| rating4plus                      | -.1393702 | .0572042  | -2.44 | 0.015 | -.2514884            | -.027252  |
| nh_mcaid_top_quartile            | .1466566  | .0655987  | 2.24  | 0.025 | .0180855             | .2752278  |
| nh_minority_top_quartile         | .1408507  | .0585785  | 2.40  | 0.016 | .0260389             | .2556626  |
| number_of_certified_beds         | -.003245  | .0011969  | -2.71 | 0.007 | -.0055909            | -.000899  |
| average_number_of_residents_per  | -.0004274 | .0014578  | -0.29 | 0.769 | -.0032847            | .0024298  |
| nfp_gov                          | .3083876  | .1058403  | 2.91  | 0.004 | .1009444             | .5158307  |
| chain                            | -.064385  | .0584186  | -1.10 | 0.270 | -.1788834            | .0501134  |
| avg_casemix                      | .5161261  | .2925996  | 1.76  | 0.078 | -.0573586            | 1.089611  |
| pctmcare_10                      | .1557923  | .0403121  | 3.86  | 0.000 | .0767821             | .2348026  |
| reported_total_nurse_staffing_ho | -.0044477 | .085077   | -0.05 | 0.958 | -.1711955            | .1623     |
| comm_cases_total_10              | .0002907  | .0001747  | 1.66  | 0.096 | -.0000517            | .0006332  |
| pop_est_100k                     | .0134351  | .014602   | 0.92  | 0.358 | -.0151842            | .0420544  |
| _cons                            | -2.075015 | .4001062  | -5.19 | 0.000 | -2.859208            | -1.290821 |

| nh_covid_deaths | Coef. | Std. Err. | z | P> z | [95% Conf. Interval] |  |
|-----------------|-------|-----------|---|------|----------------------|--|
|-----------------|-------|-----------|---|------|----------------------|--|

|                                  |           |          |       |       |           |           |
|----------------------------------|-----------|----------|-------|-------|-----------|-----------|
| logit                            |           |          |       |       |           |           |
| reported_rn_staffing_hours_per_r | -1.423774 | 1.182367 | -1.20 | 0.229 | -3.741171 | .8936231  |
| rating4plus                      | .2530681  | .3814418 | 0.66  | 0.507 | -.4945441 | 1.00068   |
| nh_mcaid_top_quartile            | .8057787  | .4746591 | 1.70  | 0.090 | -.124536  | 1.736093  |
| nh_minority_top_quartile         | .0734953  | .4356377 | 0.17  | 0.866 | -.7803389 | .9273295  |
| number_of_certified_beds         | -.0080992 | .0092643 | -0.87 | 0.382 | -.0262569 | .0100584  |
| average_number_of_residents_per  | .0211993  | .0107667 | 1.97  | 0.049 | .0000971  | .0423016  |
| nfp_gov                          | .1283144  | .5830474 | 0.22  | 0.826 | -1.014437 | 1.271066  |
| chain                            | .3918125  | .3861173 | 1.01  | 0.310 | -.3649635 | 1.148588  |
| avg_casemix                      | 5.685781  | 2.005077 | 2.84  | 0.005 | 1.755902  | 9.61566   |
| pctmcare_10                      | .1005642  | .2028184 | 0.50  | 0.620 | -.2969525 | .4980809  |
| reported_total_nurse_staffing_ho | -.6649975 | .5318093 | -1.25 | 0.211 | -1.707325 | .3773296  |
| comm_deaths_total_10             | .145353   | .0480596 | 3.02  | 0.002 | .0511578  | .2395481  |
| pop_est_100k                     | -.0638086 | .1044959 | -0.61 | 0.541 | -.2686167 | .1409996  |
| _cons                            | -6.487615 | 2.509043 | -2.59 | 0.010 | -11.40525 | -1.56998  |
| -----                            |           |          |       |       |           |           |
| glm                              |           |          |       |       |           |           |
| reported_rn_staffing_hours_per_r | -.9024963 | .4538606 | -1.99 | 0.047 | -1.792047 | -.012946  |
| rating4plus                      | -.0156362 | .1221566 | -0.13 | 0.898 | -.2550587 | .2237863  |
| nh_mcaid_top_quartile            | -.0987246 | .1332857 | -0.74 | 0.459 | -.3599599 | .1625106  |
| nh_minority_top_quartile         | -.1116143 | .1264321 | -0.88 | 0.377 | -.3594167 | .136188   |
| number_of_certified_beds         | -.0060104 | .0027475 | -2.19 | 0.029 | -.0113953 | -.0006254 |
| average_number_of_residents_per  | .0006039  | .003232  | 0.19  | 0.852 | -.0057308 | .0069385  |
| nfp_gov                          | .0250506  | .222454  | 0.11  | 0.910 | -.4109513 | .4610525  |
| chain                            | -.1554552 | .1206523 | -1.29 | 0.198 | -.3919293 | .0810189  |
| avg_casemix                      | -.3450726 | .67728   | -0.51 | 0.610 | -1.672517 | .9823718  |
| pctmcare_10                      | .0044022  | .093378  | 0.05  | 0.962 | -.1786154 | .1874197  |
| reported_total_nurse_staffing_ho | .0129189  | .1837605 | 0.07  | 0.944 | -.347245  | .3730829  |
| comm_deaths_total_10             | .0308572  | .0115761 | 2.67  | 0.008 | .0081686  | .0535459  |
| pop_est_100k                     | -.0054328 | .0351216 | -0.15 | 0.877 | -.0742699 | .0634043  |
| _cons                            | -1.881635 | .8824347 | -2.13 | 0.033 | -3.611175 | -.1520948 |
| -----                            |           |          |       |       |           |           |
